# Supplementary material for: Engineering light emission of two-dimensional materials in both the weak and strong coupling regimes
Source: publisher site journal article supplement (doi:10.1515/nanoph-2017-0041), 2017-07-22
Supplement: Supplementary file 1 [file nanoph-2017-0041_suppl.docx]

**SUPPLEMENTARY INFORMATION**

**Engineering light emission of two-dimensional materials in both the weak and strong coupling regimes**

**Mauro Brotons-Gisbert**1**, Juan P. Martínez-Pastor**1**, Guillermo C. Ballesteros**2**, Brian D. Gerardot**2 **and Juan F. Sánchez-Royo**1

1 ICMUV, Instituto de Ciencia de Materiales, Universidad de Valencia, P.O. Box 22085, 46071 Valencia, Spain

2 Institute of Photonics and Quantum Science, SUPA, Heriot-Watt University, Edinburgh EH14 4AS, UK

1. **Analytical model:**

In this work, the analytical modeling of light emission by 2D materials has been carried out using a method proposed by Stanley *et al.* named method of source terms [29]. This method has the advantage of being simple and convenient for calculating the emission characteristics of a thin source plane (sheet) in an arbitrary planar structure. The source plane is modeled by electrical oscillating dipoles distributed along a sheet which are spatially and temporally incoherent (weak coupling regime). The source is then included in the calculations through the addition of source terms that account for the electromagnetic discontinuity in the source plane. The expressions of the electromagnetic discontinuity terms (source terms A) are shown in Table 1 for different dipole configurations and polarizations. The subscript upward and downward arrows indicate positive and negative propagation directions of the emission along the z-axis, respectively. The superscripts (h) and (v) represent the direction of the emitting dipoles (horizontal or vertical, respectively) with reference to the sheet plane (plane x-y in Fig. S1), while the *s* and *p* superscript denote TE and TM polarizations, respectively.


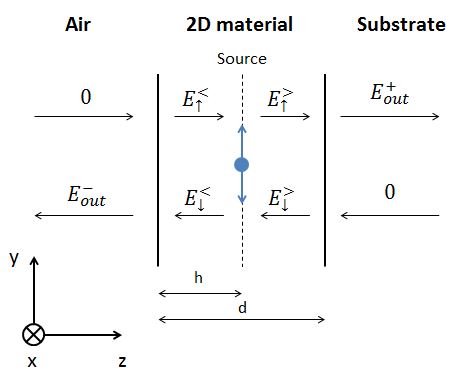


**Figure S1.** Sketch of the source terms method.

Calculating the external field emitted by a source plane in a multilayered system then comes down to solving the following system of equations:

, (S1)

, (S2)

, (S3)

where (a) and (b) are 2 x 2 transfer matrices that account for the propagation of the source from the left and from the right, respectively, as shown in Fig. S1. and indicate the electrical fields emitted in the superstrate and substrate, respectively, while and denote the electrical fields propagating along and opposite to the z direction. The < and > symbols indicate whether the field is emitted at the lower or upper side of the dipole sheet, respectively.

Equations (S1), and (S2) and (S3) can therefore be interpreted as the expression of an electrical field discontinuity at the source plane induced by the existence of electrical dipoles, and the relation linking the externally radiated and internally emitted fields, respectively.

**Table 1.** Source terms for horizontal and vertical dipoles.

| Dipole orientation | TE polarization | TM polarization |
| --- | --- | --- |
| Horizontal |  |  |
| Vertical | 0 |  |

The power density outside the multilayer structure for a given emission angle can then be calculated using

(S4)

where , () and () represent the emitted electrical field, the refractive index and the emission angle at the outside (active) medium, respectively.

The total collected power in the far-field by a microscope objective of a given numerical aperture (NA) can thus be calculated by

(S5)

In a similar way, the extraction efficiency () can be calculated by dividing the total extracted power by the total power emitted by the dipole in the cavity

(S6)

Finally, the collection efficiency () can be calculated by dividing the total collected power by the total extracted power

(S7)

Similarly, we can calculate the radiative lifetime modification (/0) of the dipole according to the formula:

, (S8)

where the numerator and the denominator are the total power emitted by the dipole in the cavity and in the bulk MoS2, respectively.

Moreover, following the work of Aad *et al.* [35], we have slightly modified the source term method to include the effects of the excitation wavelength and the excitation angle. In this way, a photoexcitation factor has been included as a weighting coefficient than represents the absorbed (dissipated) power by the source plane at the excitation wavelength. Because the energy is conserved and since the method models the source as an electrical dipole, the emitted light energy is equal to the absorbed (dissipated) energy by the dipole (assuming a quantum efficiency equal to 1). Such a photoexcitation factor is calculated using the expression of the dipolar dissipation [S1]

(S9)

where , , and are the angular frequency, the vacuum permittivity and the thickness of the source plane, respectively, while and are the imaginary part of the electrical susceptibility and the amplitude of the excitation electrical field at the source plane, respectively.

In the calculations, we assume that oscillating electrical dipoles with different orientations are uniquely excited by an electrical field oscillating parallel to its orientation. This implies that different weighting coefficients have to be considered depending on the dipole configuration. Table 2 shows the different expressions that have to be used depending on the dipole configuration. and represent the calculated excitation electric fields at the source plane for positive and negative propagation directions, respectively. denotes the propagation angle of the excitation field in the active material.

**Table 2.** Weighting coefficients for horizontal and vertical dipole configurations.

| Dipole orientation | TE polarization | TM polarization |
| --- | --- | --- |
| Horizontal |  |  |
| Vertical | 0 |  |

Finally, the influence of the thickness of the active material (when dealing with thicker active layers) can also be taken into account by dividing the volume into thin layers (sheets) of dipoles with thickness and summing the emitted power from discrete subsources with the corresponding weighting coefficients.

1. **BFP patterns of the Raman 2D mode of graphene**

**Unpolarized detection**

**
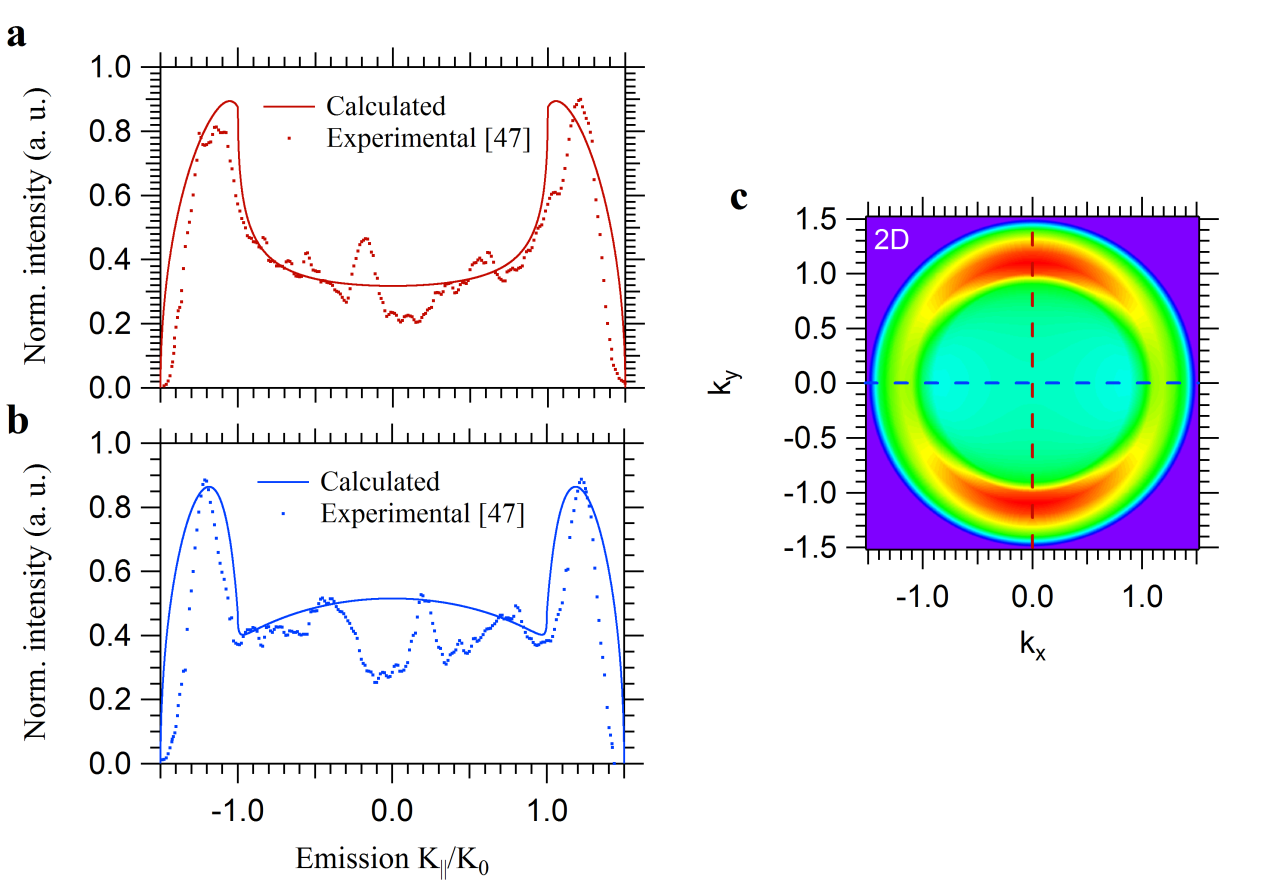
**

**Figure S2.** (**a**), (**b**) Comparison between experimental [4] and calculated graphene Raman 2D mode BFP cross sections unpolarized detection. (**c**) Calculated BFP image for the Raman 2D mode of graphene for unpolarized detection.

**Polarized detection**

**
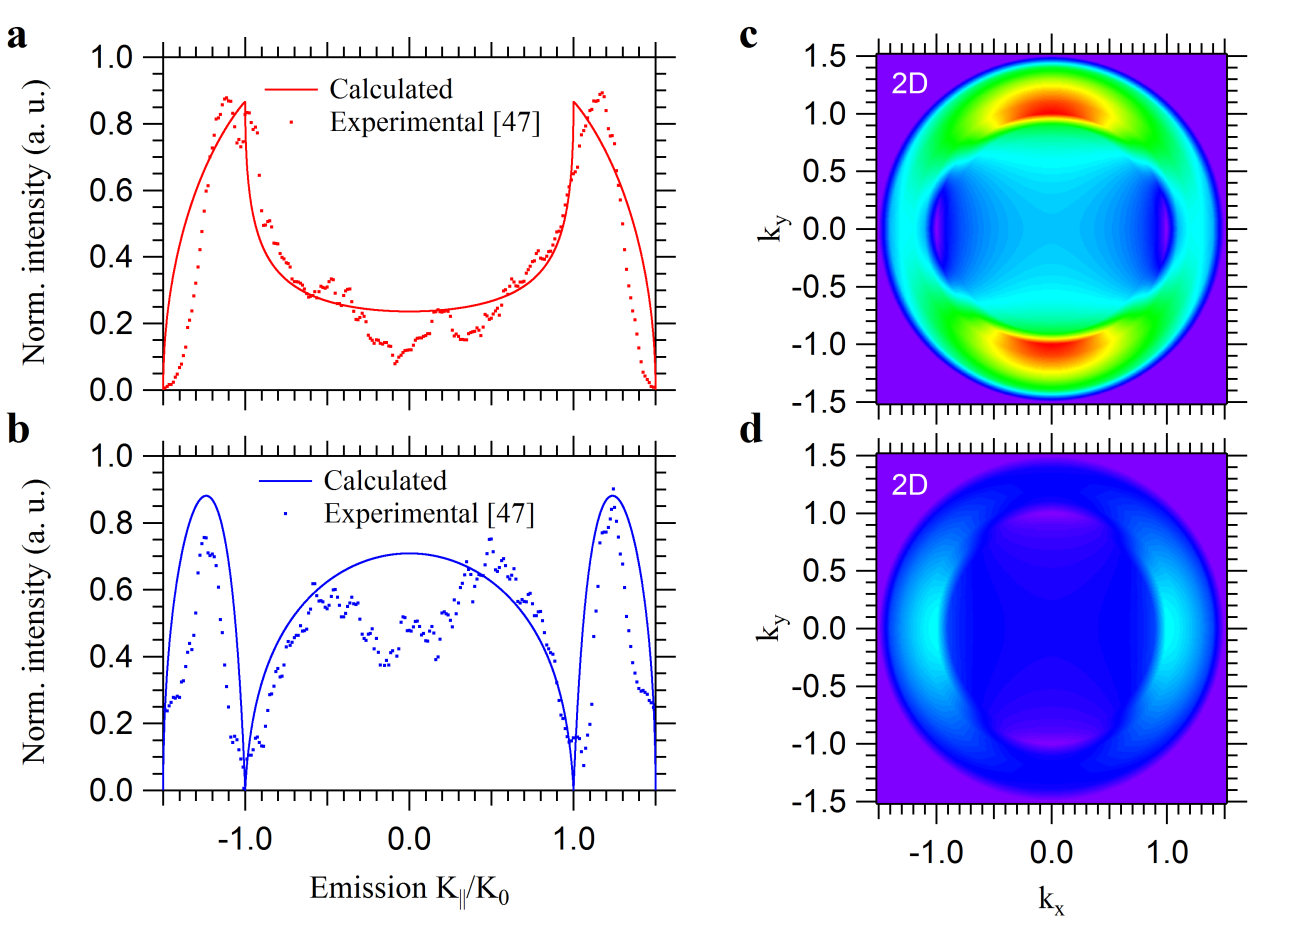
**

**Figure S3.** Comparison between experimental (as extracted from Ref. [47]) and calculated BFP cross sections of the Raman 2D mode of graphene for TE- (**a**) and TM- (**b**) polarized detections, respectively. Calculated BFP images for the Raman 2D mode of graphene for TE- (**c**) and TM- (**d**) polarized detections, respectively.

1. **Source terms methods for other 2D TMDs (WSe2)**

**
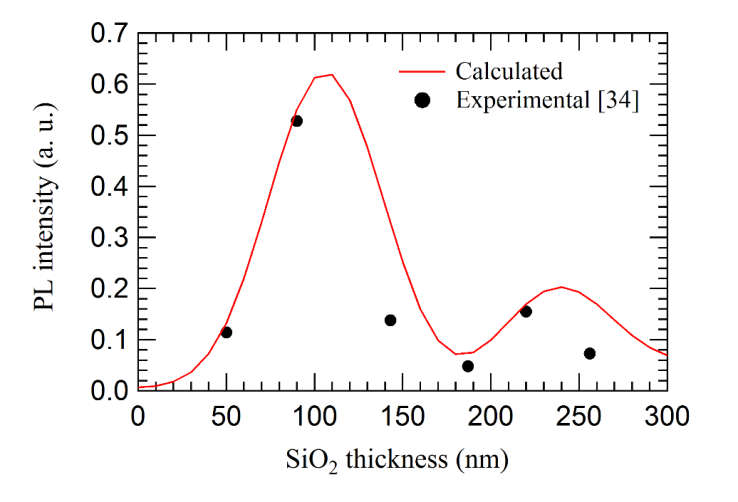
**

**Figure S4.** PL intensity of single layer WSe2 deposited onto SiO2/Si substrates as function of the SiO2 thickness SiO2-layer, as extracted from Ref. [34]. Solid curve is the SiO2-layer thickness dependence of the PL intensity calculated by using the MST. For the calculations, an excitation wavelength of 532 nm was used, in order to simulate experimental conditions.

1. **Modeling the Raman intensities of the G and 2D modes of ML graphene as a function of the SiO2 layer thickness**

**
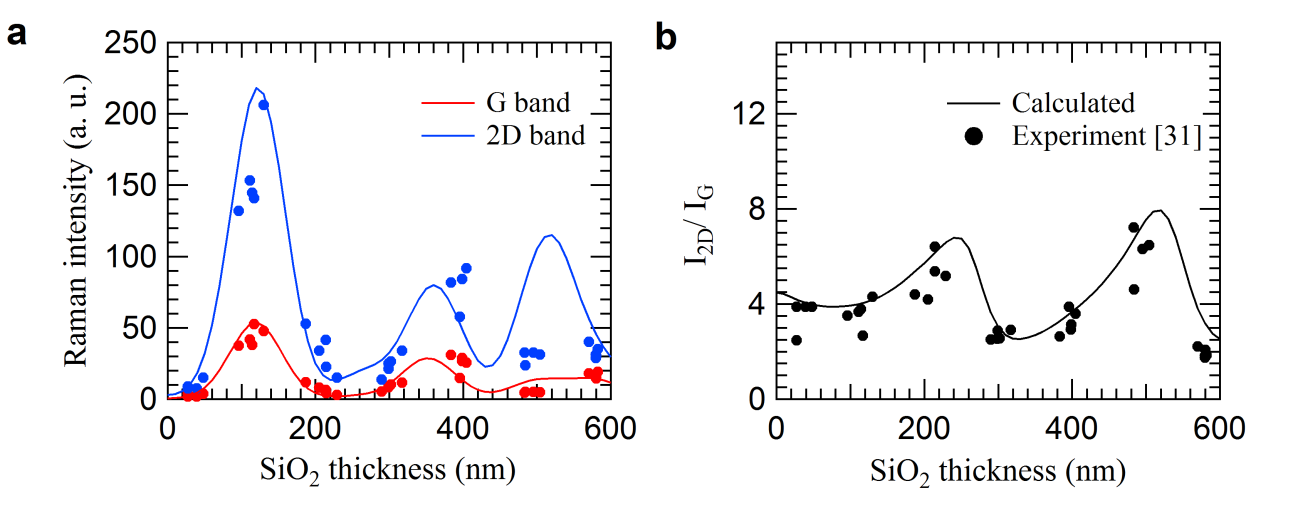
**

**Figure S5.** (**a**)Comparison between experimental and calculated values of the collected intensity for the Raman G and 2D modes of graphene deposited onto Si/SiO2 substrates as function of the SiO2 thickness. (**b**) Comparison of the experimental and calculated values of the intensity ratio for graphene Raman 2D and G modes. Experimental values have been obtained from [31].

1. **Modeling the collected intensity of the A1g and E12g Raman modes of ML MoS2 as a function of the SiO2 thickness**

Figures S6a and S6b show the calculated and experimental Raman intensity variation of the A1g and E12g modes of ML MoS2 deposited onto SiO2/Si substrates as a function of the SiO2 thickness. Experimental values shown in these figures have been taken from Ref. [25]. A very good correspondence between measured and calculated values is observed for Raman scattered light. Three peaks of the Raman intensity with decreasing intensities can be observed for SiO2 thicknesses of 95, 260 and 430 nm. An excitation wavelength of 488 nm was used for both experimental and calculated values.

Figure S6c shows that the model can also be used to predict the variation of the emitted light intensity due to changes in the thickness of the active material. This figure shows the calculated Raman intensity of the E12g mode for MoS2 flakes of different thicknesses supported on Si/SiO2 substrates with 285 nm of SiO2. Experimental values have been taken from [24]. A very good agreement between experiment and calculations can be observed again, with the model reproducing very good the two maxima observed for MoS2 flakes ̴ 5 and ̴ 85 nm thick.


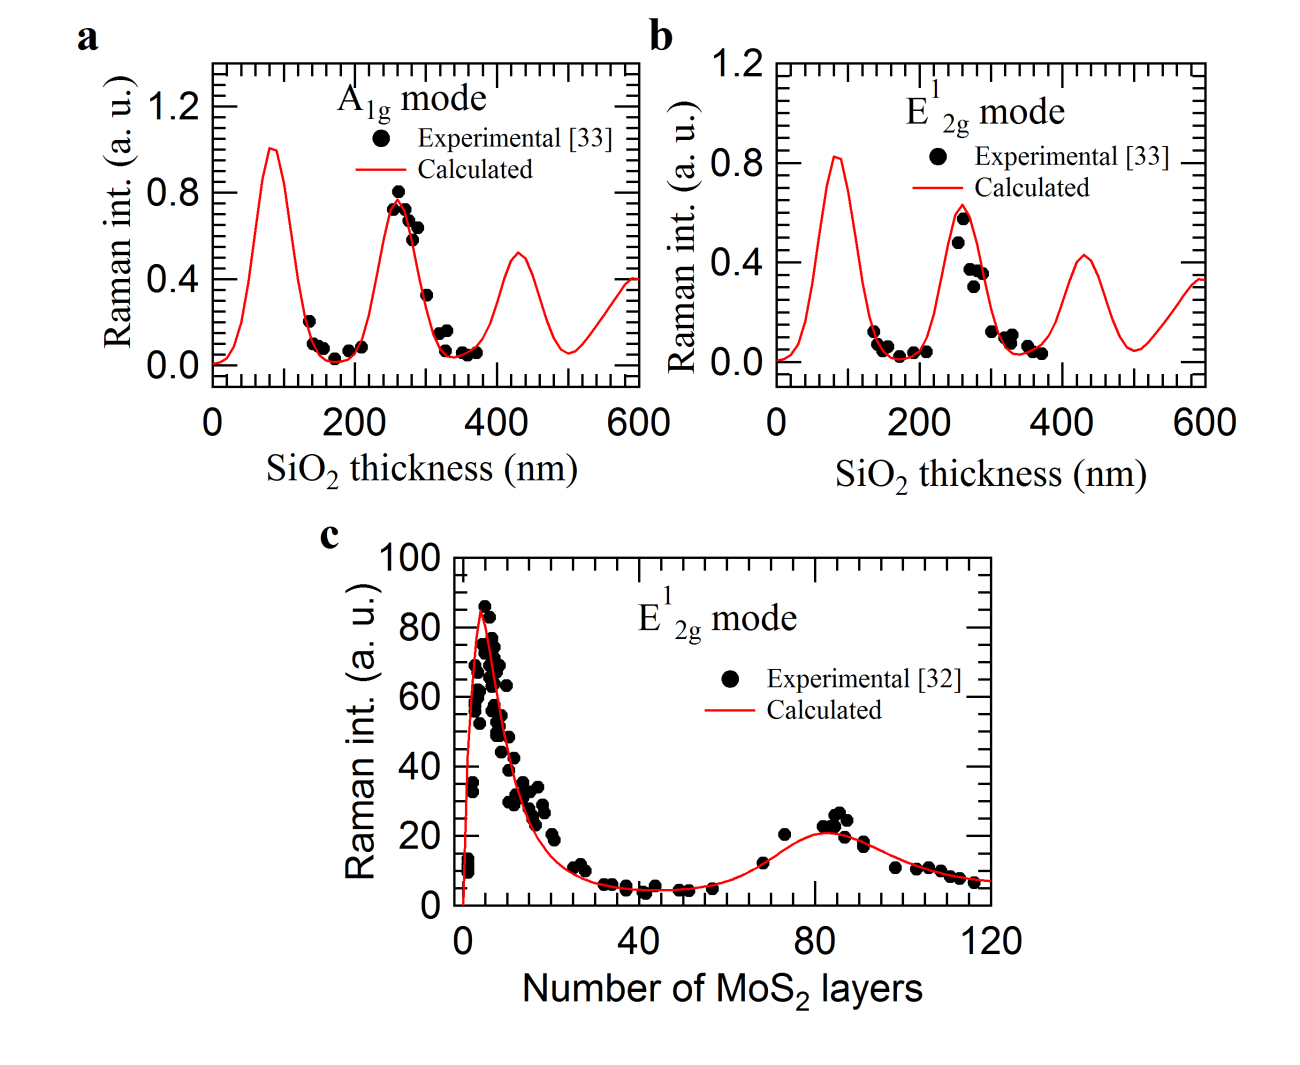


**Figure S6.** Calculated and experimental Raman intensity variation of the A1g (**a**) and E12g (**b**) modes of ML MoS2 deposited onto SiO2/Si substrates as a function of the SiO2 thickness. Experimental values shown in (**a**) and (**b**) have been obtained from Ref. [33]. (**c**) Calculated and experimental Raman intensity variation of the E12g mode of MoS2 deposited onto a SiO2(285nm)/Si substrate as a function of the MoS2 thickness. Experimental values shown in this figure have been taken from Ref. [32].

1. **Optimizing single-photon extraction in 2D h-BN**

Figure S7 shows calculations in which the source term method has been applied to calculate the collected emission intensity of a SPE in 2D h-BN deposited on SiO2/Si and Al2O3 /Al substrates. The range of emission wavelengths for the SPEs has been considered to be between 565 and 775 nm [8]. In these calculations we have not included the absorption efficiency, so the results are independent of the excitation wavelength. A NA of 0.9 have been assumed in the calculations. Figure S7a shows a contour plot of the single-photon emission intensity in 2D h-BN as a function of the thickness of the underlying SiO2 and the SPE emission wavelength. Two bands of high single-photon emission intensity appear for SiO2 average thicknesses of ~130 and ~ 350 nm. Figure S7b shows the calculated single-photon collection efficiency as a function of the emitter wavelength for the optimized SiO2 thicknesses of 130 and 350 nm. Insets in Figure S7b show the far-field emission patterns of SPEs radiating at 623 nm for both 130 (left) and 350 nm (right) SiO2 thicknesses. These results indicate that although a SiO2 thickness of 130 nm gives rise to a weaker collected single-photon emission than the 350 nm, it presents a more symmetric far-field emission pattern.

**
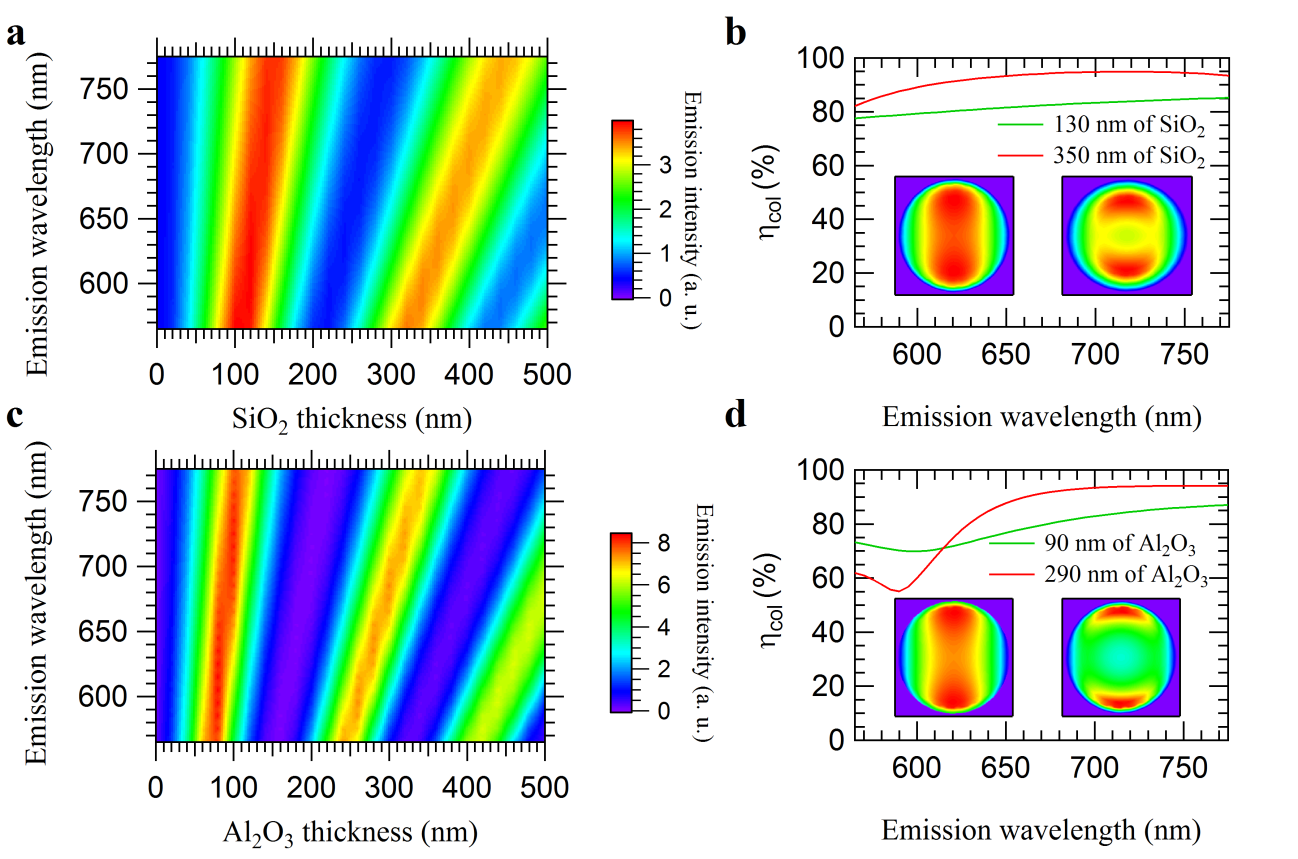
**

**Figure S7.** (**a**) Calculated single-photon emission intensity in SL h-BN deposited on a SiO2/Si substrate as a function of the emission wavelength and the SiO2 thickness. (**b**) Calculated single-photon collection efficiency for SiO2 thicknesses of 130 and 350 nm. The insets show the far-field emission patterns of SPEs radiating at 623 nm for both 130 (left) and 350 nm (right) SiO2 thicknesses (**c**) Calculated SPE in SL h-BN deposited on a Al2O3/Al substrate as a function of the emission wavelength and the Al2O3 thickness. (**d**) The insets show the far-field emission patterns of SPEs radiating at 623 nm for both 90 (left) and 290 nm (right) Al2O3 thicknesses.

Figure S7c shows a similar calculation to that shown in Figure S7a where the SiO2/Si substrate has been replaced by Al2O3/Al. The contour plot shows the dependence of the collected emission intensity as a function of the thicknesses of the underlying Al2O3 and the SPE emission wavelength. As it can be seen in this figure, three bands of high single-photon emission intensity appear for Al2O3 thicknesses of ~90, ~290 and ~450 nm, being 450 nm the thickness of Al2O3 that yields to the highest single-photon emission intensity. Results shown in Figure S7a and Figure S7c indicate that the Al2O3/Alsubstrate outperforms the SiO2/Si one in terms of emission intensity by a factor of ~2. Figure S7d shows the calculated single-photon collection efficiency as a function of the emitter wavelength for the two of the optimized Al2O3 thicknesses of 90 and 290 nm. Insets in Figure S7d show the far-field emission patterns of SPEs radiating at 623 nm for both 90 (left) and 290 nm (right) Al2O3 thicknesses. As for the case of SiO2, these results indicate that the lowest Al2O3 thickness presents a more symmetric far-field emission pattern.

**Supplementary References**

[1] Benisty H, Stanley R and Mayer M 1998 Method of source terms for dipole emission modification in modes of arbitrary planar structures *J. Opt. Soc. Am. A* **15** 1192

[2] Aad R, Blaize S, Bruyant A, Couteau C and Lérondel G 2010 Enhancement of ultrathin film emission using a waveguiding active layer *J. Appl. Phys.* **108** 0–7

[3] Yariv A and Yeh P 2007 *Photonics - Optical Electronics in Modern Communications* (New York: Oxford University Press, Inc.)

[4] Budde H, Coca-López N, Shi X, Ciesielski R, Lombardo A, Yoon D, Ferrari A C and Hartschuh A 2016 Raman Radiation Patterns of Graphene *ACS Nano* **10** 1756–63

[5] Lien D-H, Kang J S, Amani M, Chen K, Tosun M, Wang H-P, Roy T, Eggleston M S, Wu M C, Dubey M, Lee S-C, He J-H and Javey A 2015 Engineering Light Outcoupling in 2D Materials *Nano Lett.* **15** 1356–61

[6] Liu C, Ma Y, Li W and Dai L 2013 The evolution of Raman spectrum of graphene with the thickness of SiO2 capping layer on Si substrate *Appl. Phys. Lett.* **103** 213103

[7] Zhang H, Wan Y, Ma Y, Wang W, Wang Y and Dai L 2015 Interference effect on optical signals of monolayer MoS2 *Appl. Phys. Lett.* **107** 101904

[8] Tran T T, Elbadawi C, Totonjian D, Lobo C J, Grosso G, Moon H, Englund D R, Ford M J, Aharonovich I and Toth M 2016 Robust Multicolor Single Photon Emission from Point Defects in Hexagonal Boron Nitride *ACS Nano* **10** 7331–8
